# Supplementary material for: Vibrionaceae core, shell and cloud genes are non-randomly distributed on Chr 1: An hypothesis that links the genomic location of genes with their intracellular placement
Source: PubMed Central journal article supplement (PMC7542380; doi:10.1186/s12864-020-07117-5), 2020-10-06
Supplement: 12864_2020_7117_MOESM2_ESM.pdf [file 12864_2020_7117_MOESM2_ESM.pdf]

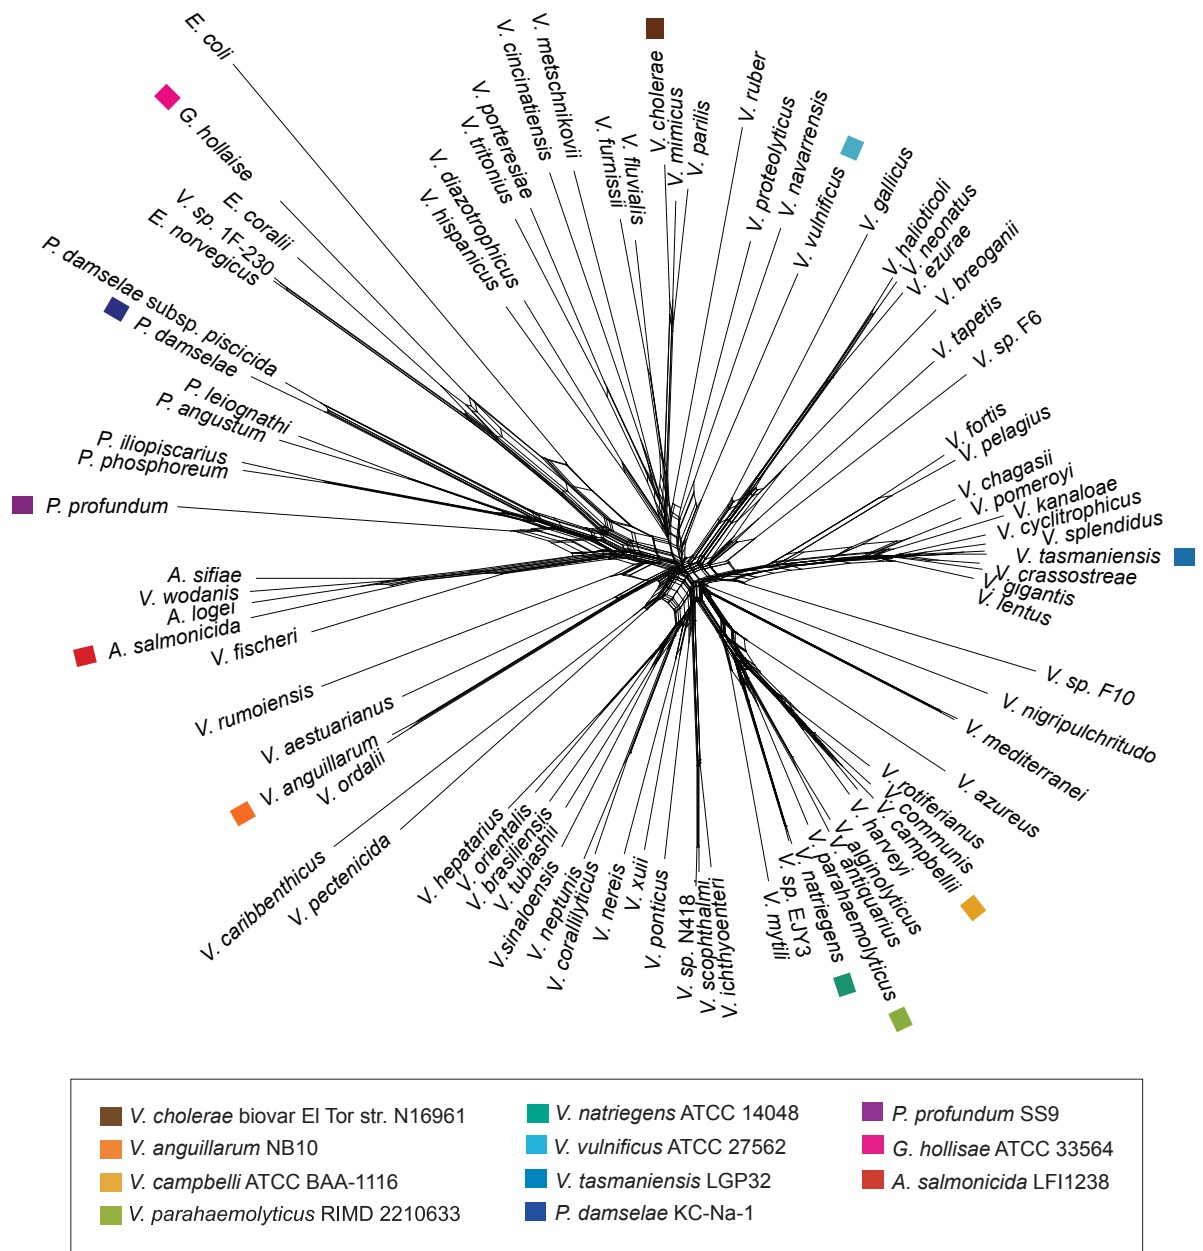

**Figure S1:**

The 11 representative *Vibrionaceae* genomes mapped to a phylogeny. The phylogenetic split network is based on a dataset from Sawabe and co-workers (Sawabe et al 2013. *Frontiers in Microbiology* 4(414). DOI:10.3389/fmicb.2013.00414) and consists of concatenated genes *ftsZ*, *gap*, *gyrB*, *pyrH*, *recA*, *rpoA* and *topA*. The tree was constructed using SplitsTree4 to concatenate the individual gene alignments and settings for network were uncorrected P and NeighborNet.
