# Supplementary material for: Vibrionaceae core, shell and cloud genes are non-randomly distributed on Chr 1: An hypothesis that links the genomic location of genes with their intracellular placement
Source: PubMed Central journal article supplement (PMC7542380; doi:10.1186/s12864-020-07117-5), 2020-10-06
Supplement: 12864_2020_7117_MOESM5_ESM.pdf [file 12864_2020_7117_MOESM5_ESM.pdf]

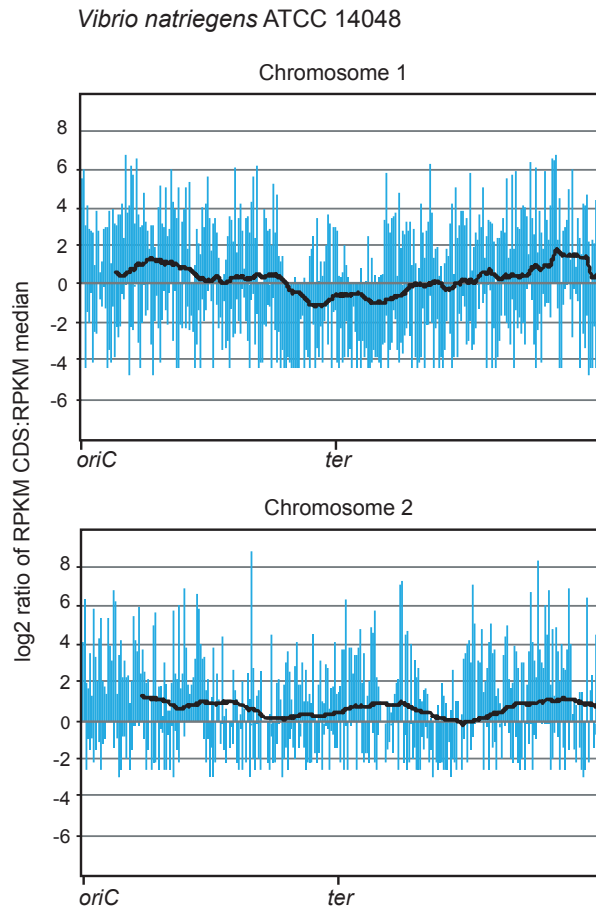

**Figure S3:**

Global expression maps of *V. natriegens* ATCC 14048 (grown under slow-growing conditions) chromosomal genes centered around the median. Data points ( $\log_2$  ratio RPKM CDS:RPKM median) for each CDS are shown, as well as a trend line averaged over a sliding window of 200 data points.
