# Supplementary material for: Vibrionaceae core, shell and cloud genes are non-randomly distributed on Chr 1: An hypothesis that links the genomic location of genes with their intracellular placement
Source: PubMed Central journal article supplement (PMC7542380; doi:10.1186/s12864-020-07117-5), 2020-10-06
Supplement: 12864_2020_7117_MOESM6_ESM.pdf [file 12864_2020_7117_MOESM6_ESM.pdf]

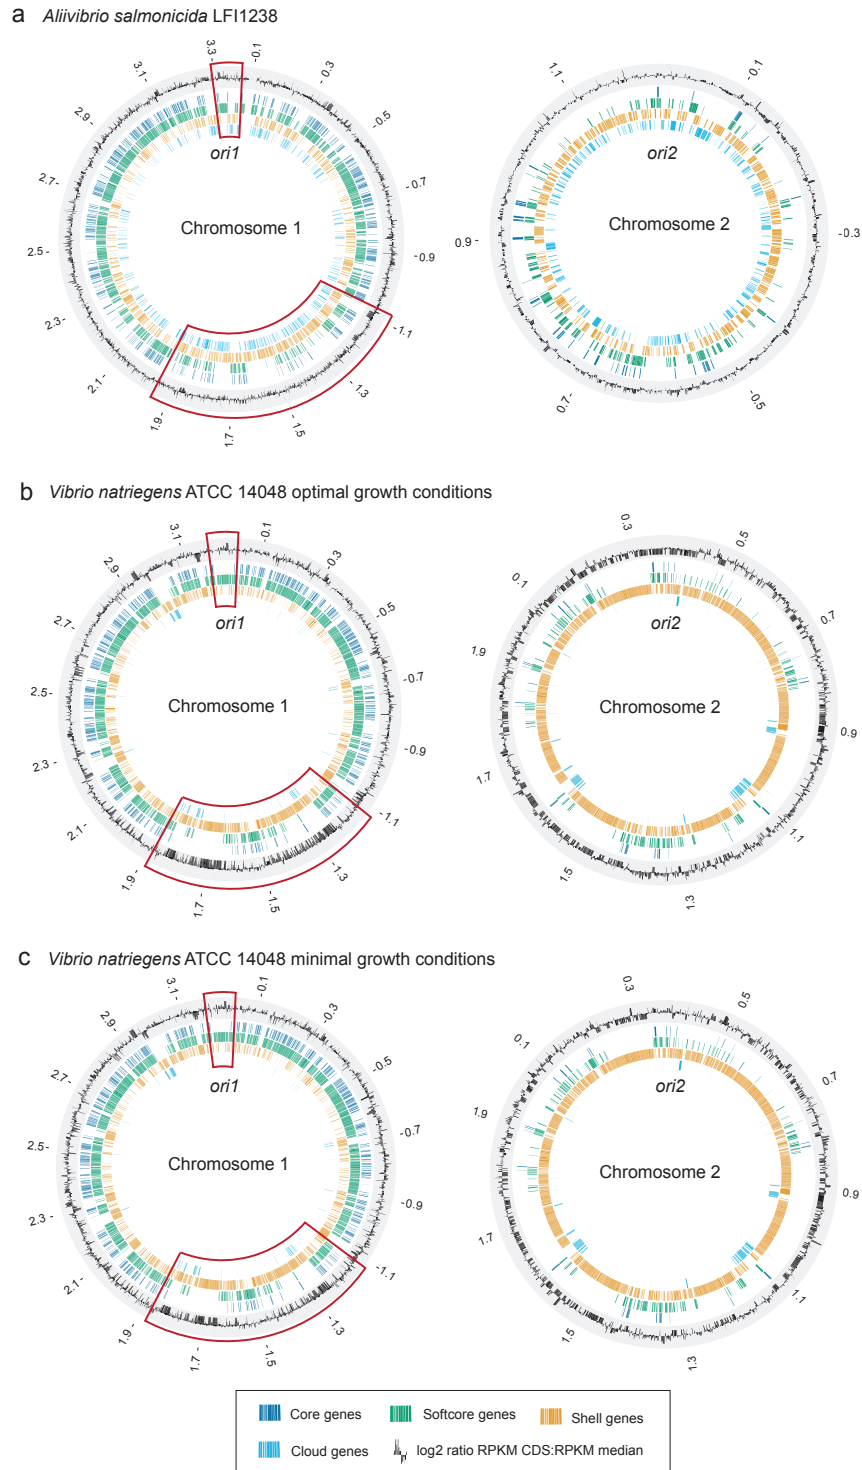

**Figure S2:**

Circular visualization map of all pangene categories and gene expression patterns ( $\log_2$  ratio RPKM CDS:RPKM median) of (a) *A. salmonicida* LFI1238 and *V. natriegens* ATCC 14048 grown under (b) fast- and (c) slow-growing conditions. The areas marked in red correspond to “i” and “ii” in Fig. 2. Megabases are labeled as ticks. The genome comparison tool Circos [24] was used to create the figure.
